# Supplementary material
Source: PubMed Central journal article supplement (PMC2718329)
Supplement: 0812528106_0812528106SI.pdf [file 0812528106_0812528106SI.pdf]

# Supporting Information

Meyer-Schaller et al. 10.1073/pnas.0812528106

## SI Text

**Sequence Analysis and Modeling.** The model of the DCNL3 PONY domain was generated based on the structure of scDcn1 (1, 2) through the Swiss Model Server and modified by using the software COOT. Cul sequences were aligned by using the Vector NTI program (Invitrogen). For the multiple sequence alignment of DCNL3 N-terminal domain, the MAFFT program was used (3). Myristoylation of DCNL3 was predicted with “medium confidence” and “reliable,” respectively, by analyzing the DCNL3 amino acid sequence (GenBank accession no. NP\_775746) by using the algorithms at [www.exPASy.org/tools/myristoylator](http://www.exPASy.org/tools/myristoylator) (4) and <http://mendel.imp.ac.at/myristate/SUPLpredictor.htm> (5).

**Yeast Experiments.** Yeast expression was achieved by cloning DCNL-HA cDNAs or *DCN1* into p413GPD or p423ADH (6), respectively, followed by transformation into *dcn1Δ* or *rub1Δ* strains (S288C background). Exponentially growing yeast cultures were lysed by using the Fastprep system (Qbiogen), and the neddylation state of Cdc53 was examined by immunoblotting with polyclonal Cdc53 antibodies (Santa Cruz).

**cDNAs and Primers.** To clone the human Dcn1-like proteins, the following IMAGE clones were used as cDNA templates (IMAGE clone cDNA no. is in parentheses): DCNL1 (3939758), DCNL2-1 and DCNL2-2 (6494926), DCNL3 (5590225), and DCNL5 (2821548).

Details of primers used for cloning and RT-PCR are available on request.

**RT-PCR.** mRNA levels were compared by quantitative RT-PCR. To extract mRNA from cells, cells were lysed with QIAshredder columns (Qiagen), RNA was isolated with RNeasy kit (Qiagen), and mRNA was reverse-transcribed to cDNA with RNase H-Reverse transcriptase (Invitrogen) and random primers from Microsynth. cDNA levels were quantified by using SYBR Green PCR Master mix and ABI Prism 7000 Sequence Detection System from Applied Biosystems. Individual samples were normalized to the human housekeeping gene GAPDH.

**RNAi Oligos.** For control RNAi, scrambled siRNA from Microsynth was applied (negative control, AGGUAGU-GUAAUCGCCUUGTT). The following siRNA duplexes were used for specific down-regulation of genes: siRNA hUbc12 target region cDNA, GGGCTTCTACAAGAGTGGGAAGT; siRNA DCNL1 target region cDNA, TCCTGAACTTTATAT-ACGA; siRNA DCNL2 target region cDNA, GC-GAGAGAACTGCTATCTA; stealth siRNA DCNL3 target region cDNA, CCACAGAATTTTCGAGTGCTGCT.

**Antibodies.** Antibodies against full-length GST-DCNL2 or GST-DCNL3 were raised in rabbits (Eurogentec) and affinity-purified on MBP-DCNL2 or MBP-DCNL3, respectively. DCNL2 antibodies cross-react with the closely related DCNL1.

The following antibodies were used in this study: Cdc53 (yC-18; Santa Cruz), Cul1 (51–1800; Zymed), Cul2 (71–8700; Zymed), Cul3 (7), Cul4 C-terminal antibody (recognizes Cul4A and Cul4B) (8), Cul5 (H-300; Santa Cruz), Cul7 (Bethyl Laboratories), hUbc12 (A-655; Boston Biochem), Nrf2 (sc-13032; Santa Cruz), CAND1 (sc-10672; Santa Cruz), Flag M2 (F3165; Sigma), HA11 (MMS-101R; Covance), Rbx1 (AVARP03042; AVIVA Systems Biology),  $\alpha$ -tubulin (T5169; Sigma), GST

(Santa Cruz), His (Qiagen), Na<sup>+</sup>/K<sup>+</sup> ATPase (Ab7671; Abcam), HNRPC (hnRNP-C1/C2, R5028; Sigma), Calnexin (a gift from A. Helenius), Caveolin1 (sc894; Santa Cruz), EGFR (MS-400-P1; ThermoScientific), Avidin-HRP (Bio-Rad), and neutravidin-HRP (Pierce).

**Protein Purification and in Vitro Binding.** GST-tagged human Cul3 complexed with 6 $\times$ His-tagged Rbx1 was expressed in Sf9 insect cells and purified by using Ni-NTA agarose resin (Qiagen) (7). 6 $\times$ His-tagged human DCNL1 and DCNL3 wild-type and mutant proteins were expressed and purified from *Escherichia coli* BL21 (DE3) cells. A 20- $\mu$ L sample containing 200 pmol of GST-Cul3/6 $\times$ His-Rbx1 complex was mixed with various amounts of wild-type 6 $\times$ His-DCNL1/3 or mutant proteins, incubated for 1 h at 4  $^{\circ}$ C, and then captured by 10  $\mu$ L of glutathione resin in 100  $\mu$ L of assay buffer [20 mM Hepes (pH 7.5), 150 mM NaCl, 0.1% Nonidet P-40, and 1 mM DTT]. For human DCNL3 and hUbc12 interaction, GST-tagged Cdc34, UbcH7, and hUbc12 were expressed in *E. coli* BL21 (DE3) cells and immobilized on glutathione resin. Five microliters of glutathione resin containing 200 pmol of GST-hUbc12, UbcH7, or Cdc34 was mixed with 600 pmol of 6 $\times$ His-DCNL3 and incubated for 1 h at 4  $^{\circ}$ C in assay buffer. After incubation, the glutathione resin was washed 3 times with 1 mL of assay buffer and then eluted with SDS buffer. Bound proteins were detected by immunoblotting using anti-GST (Santa Cruz) and anti-His antibodies (Qiagen).

**Immunoprecipitations.** HeLa cells were lysed by needle extraction in Nonidet P-40 lysis buffer for 30 min at 4  $^{\circ}$ C. Cell lysates were centrifuged for 10 min at maximum speed in a tabletop centrifuge to remove cell debris. The low-speed extract was incubated for 2 h at 4  $^{\circ}$ C with precross-linked beads (anti-HA-agarose, A2095; Sigma) or Affiprep protein A beads (BioRad), cross-linked to the antibody of interest by using dimethylpimelimidate dihydrochloride (Sigma), then washed 3 times with TBS-T (0.05% Tween20), 4 times with IP buffer [20 mM Tris (pH 7.5), 150 mM NaCl, 5 mM MgCl<sub>2</sub>, 0.1% Nonidet P-40, 5% glycerol, 20 mM  $\beta$ -glycerophosphate, 1 mM DTT, complete protease inhibitor], and 3 times with TBS-T. Finally, bound proteins were eluted from beads with 100 mM glycine (pH 2) and denatured with 4 $\times$  SDS loading buffer for 10 min at 95  $^{\circ}$ C.

**Cell Fractionation and Isolation of DRMs.** Two 14-cm dishes of HeLa cells or HeLa cells transfected with HA-tagged wild-type or DCNL3 mutants were harvested in sucrose lysis buffer [250 mM sucrose, 20 mM Tris (pH 7.5), 100 mM NaCl, 5 mM MgCl<sub>2</sub>, 1 mM NaF, 20 mM  $\beta$ -glycerophosphate, 1 mM DTT, complete protease inhibitor mixture] and subjected to osmotic pressure for 10 min on ice. After swelling, cells were broken by 10 passes through a 22G needle, and an aliquot was saved for the whole-cell control. The cell lysates were centrifuged twice at 16,000  $\times$  g for 10 min to obtain a postnuclear lysate. The postnuclear supernatant was centrifuged at 100,000  $\times$  g for 45 min to separate membrane and cytosol fractions. To enhance the purity of the samples, the remaining supernatant was recentrifuged twice to remove pellet leftovers, while the original pellet after ultracentrifugation was twice resuspended in sucrose lysis buffer [supplemented with DNase (2.7 units/mL) and RNase (40  $\mu$ g/mL)] followed by ultracentrifugation. The purified cytoplasmic fraction was denatured with 4 $\times$  SDS sample buffer for 10 min at 95  $^{\circ}$ C. The purified membrane fraction was resuspended in equal





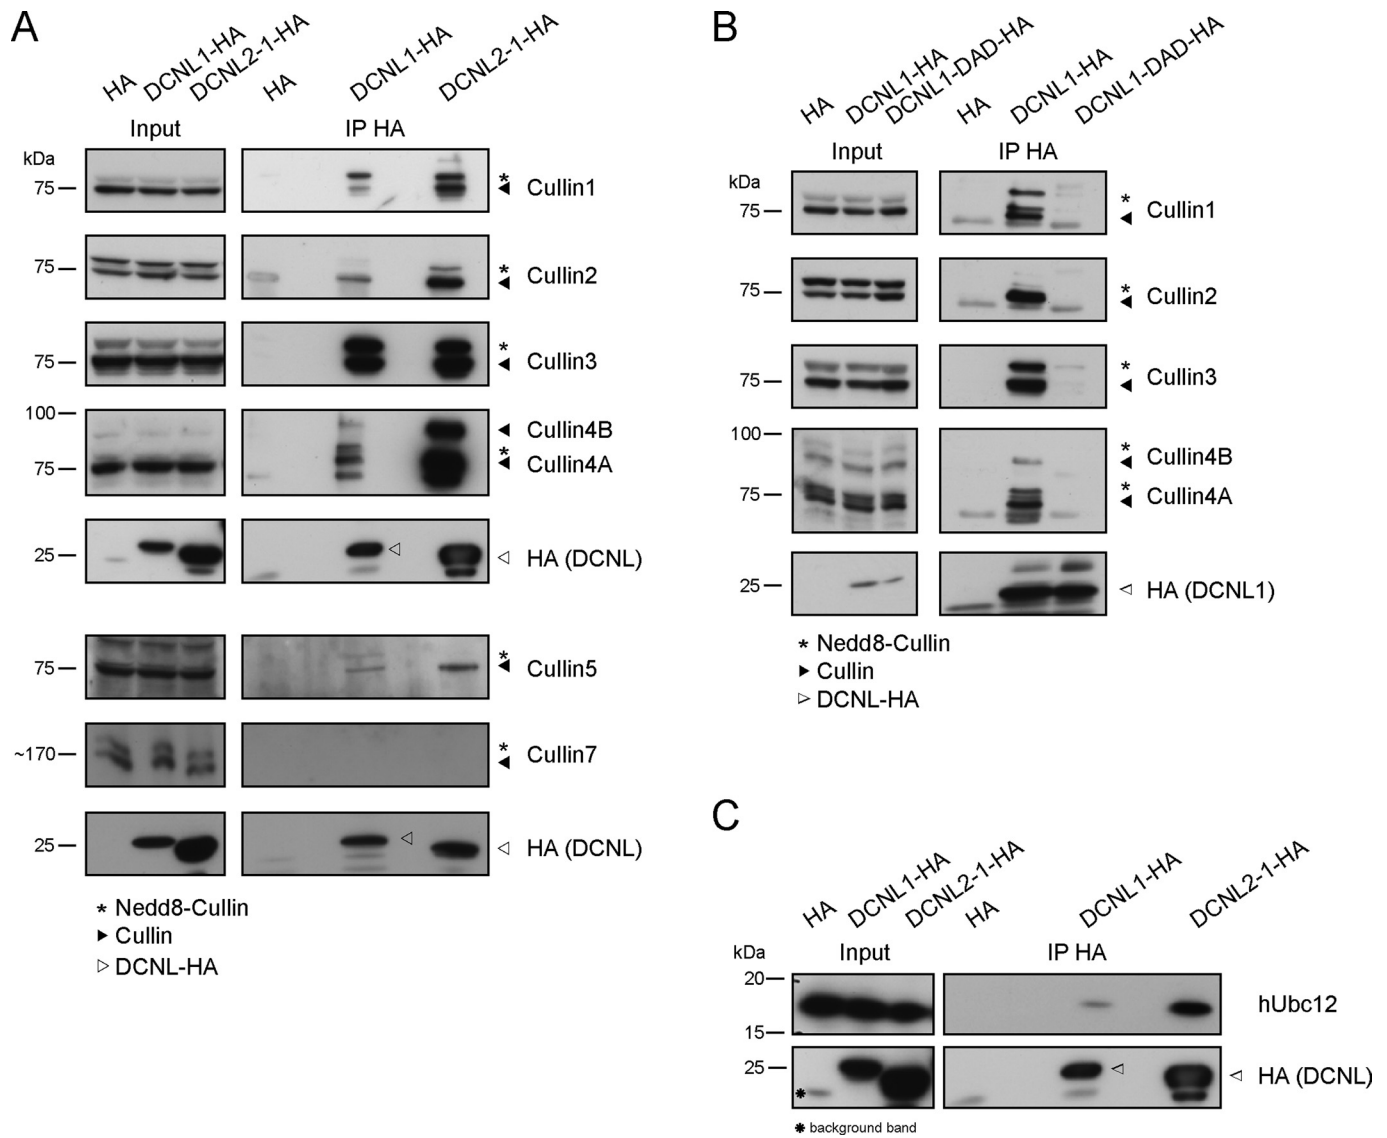

**Fig. 52.** DCNL1 and DCNL2 bind to human Culs and hUbc12. (A) Extracts prepared from HeLa cells expressing either HA-control (HA) or the indicated HA-tagged DCNL were immunoprecipitated with HA-antibodies (IP HA) and associated Culs were analyzed with specific antibodies. An aliquot of the extract before immunoprecipitation is shown at *Left* (input). (B) DCNL1-HA or DAD patch mutated DCNL1-DAD-HA stably expressed in 293T-Rex cells were analyzed by immunoprecipitation for their ability to bind endogenous Culs as described in A. Note that an intact DAD patch of DCNL1 is required for Cul binding. (C) DCNL1-HA and DCNL2-HA immunoprecipitations were analyzed for interaction with hUbc12 as described in A.

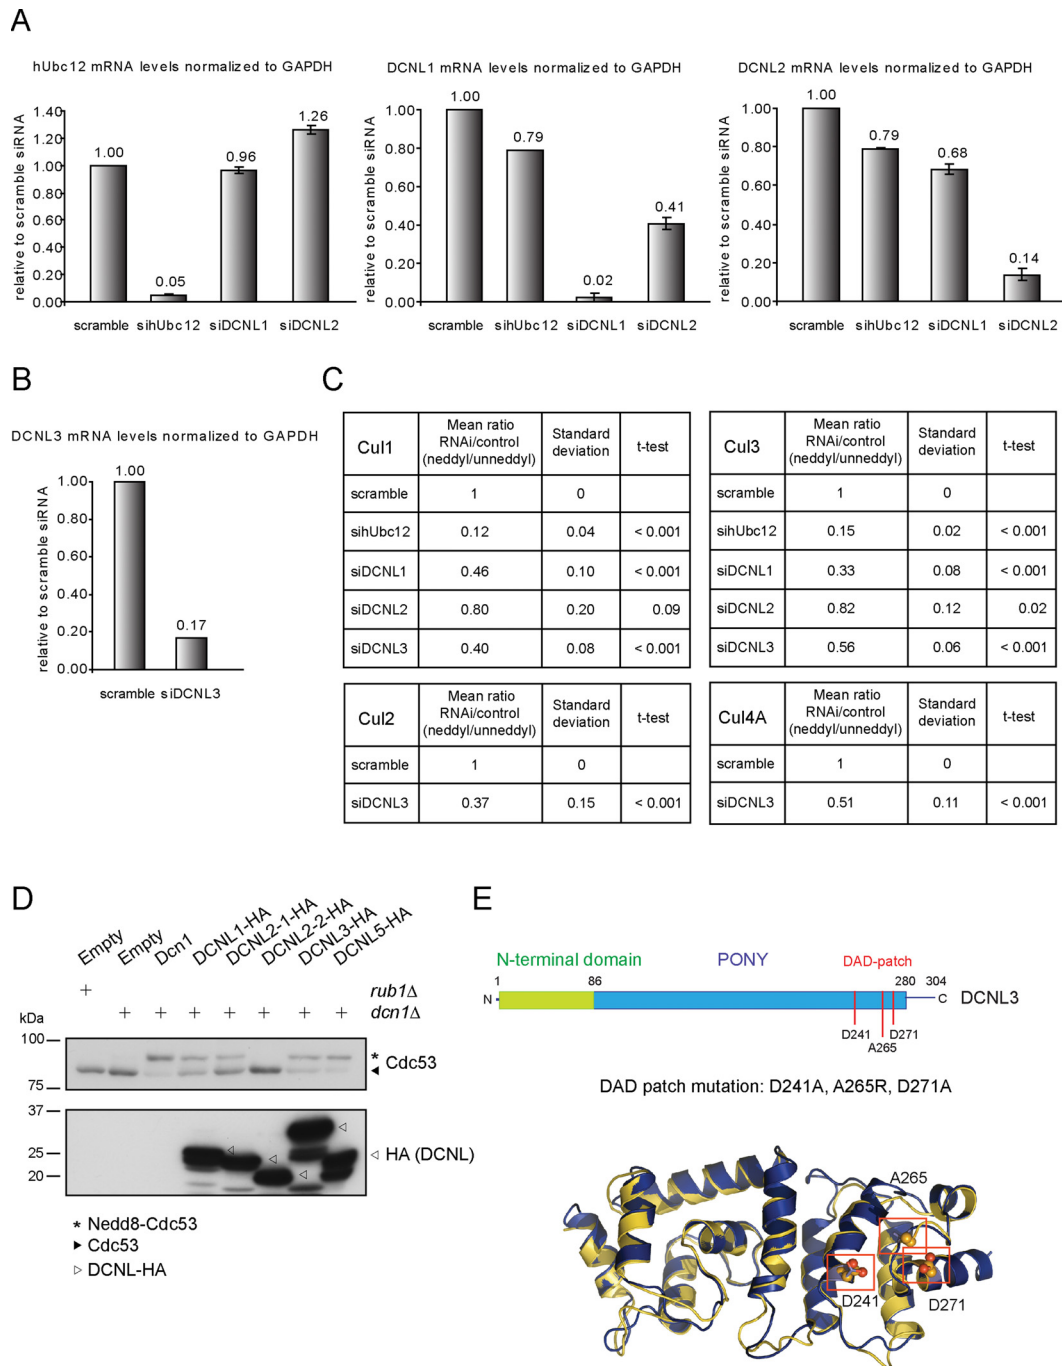

**Fig. S3.** Yeast complementation assays and effect of DCNL1–3 down-regulation on Cul neddylation in HeLa cells. (A and B) A fraction of cells used to analyze the neddylation state of endogenous Culs after RNA interference (Fig. 1 A and B) was used for isolation of total RNA and subsequent quantification of specific mRNA levels by quantitative RT-PCR. Individual panels show the mRNA levels of hUbc12, DCNL1, and DCNL2 (A) and DCNL3 (B) upon different siRNA treatments. DCNL and hUbc12 mRNA levels were normalized to GAPDH mRNA levels. (C) The neddylation state of Cul proteins after RNA interference with DCNL1–3 (Fig. 1 A and B) was quantified with LI-COR from at least 4 independent experiments. Listed are the mean values and standard deviations of the ratio between specific RNAi and scramble control RNAi of neddylated Cul over unneddylated Cul. Student's *t* test was performed to assess the significance of the difference between scramble control and RNAi for the mean ratio. Values <0.01 are judged as highly significant. (D) Yeast *dcn1Δ* or *rub1Δ* cells were transformed with an empty control plasmid (empty), or plasmids expressing as indicated yeast Dcn1 or the indicated human DCNL protein from the constitutive *ADH*- or *GPD*-promoter. Note that the DCNL2–2 splice variant lacks the C-terminal DAD patch (Fig. S1A). Cdc53 or the DCNL proteins were detected by immunoblotting of yeast extracts. (E) Schematic representation of DCNL3 highlighting the residues comprising the carboxyl-terminal DAD patch. Superimposition of the crystal structure of the scDcn1 PONY domain (blue) with the predicted PONY domain of human DCNL3 (yellow). The positions of the conserved DAD patch residues of scDcn1 (sticks) and human DCNL3 (spheres) are highlighted with red boxes.

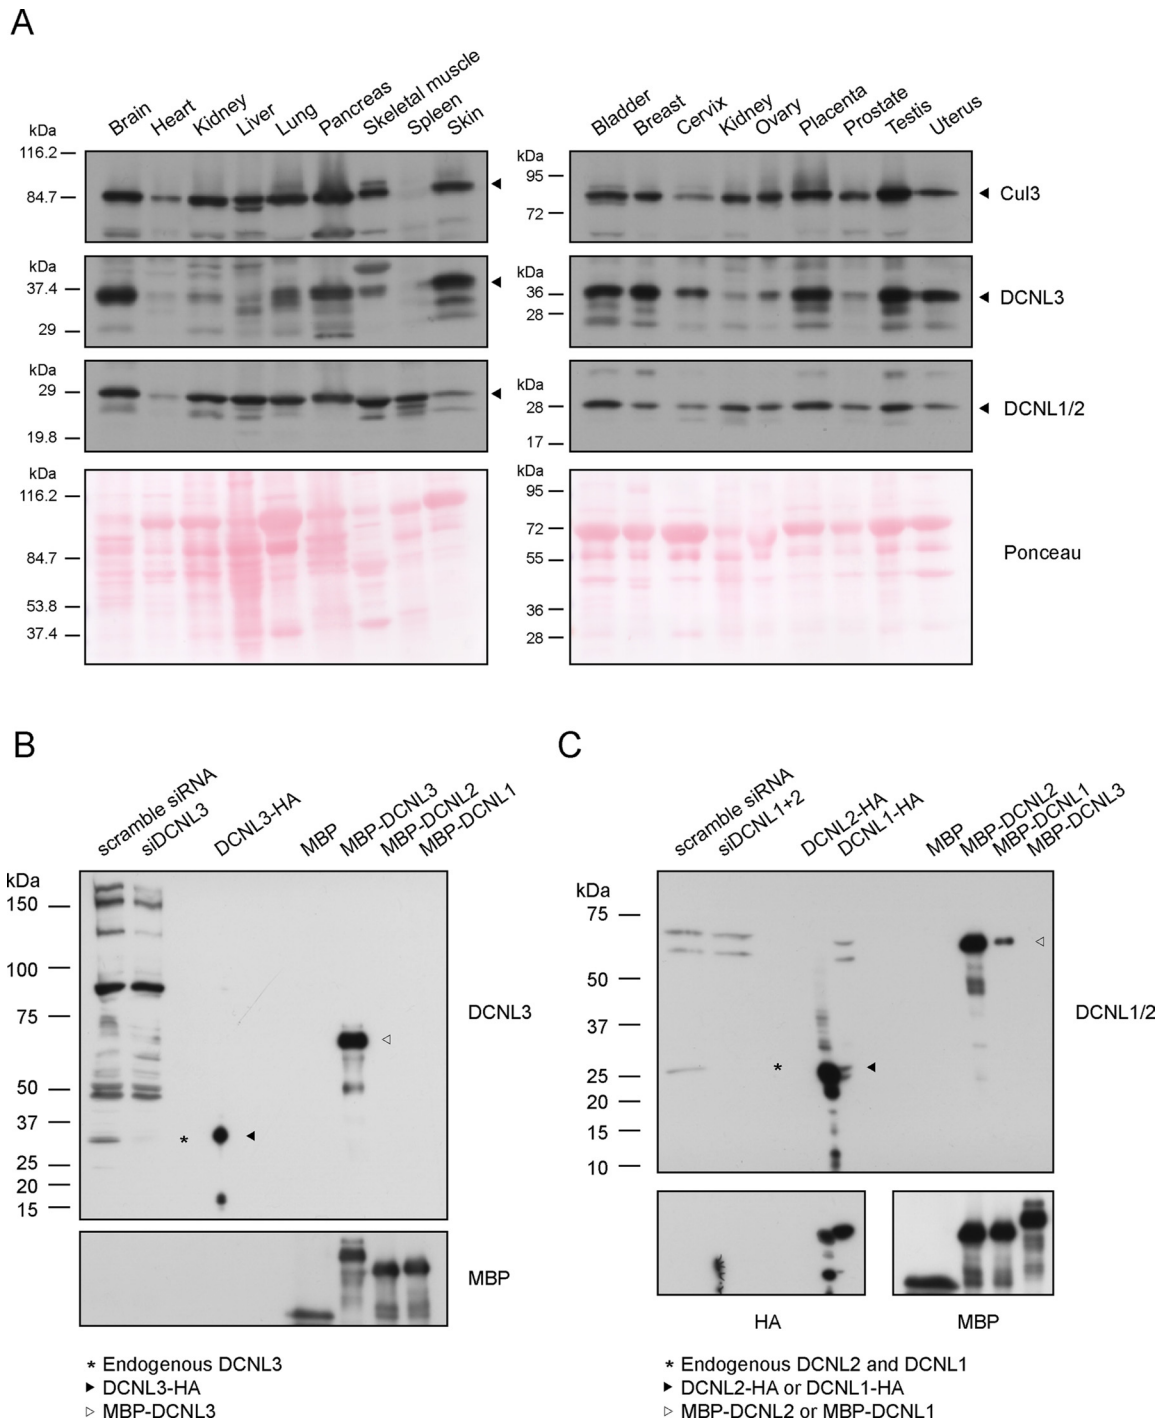

**Fig. S4.** Characterization of DCNL3 and DCNL1/2 antibodies and the tissue-specific expression of Cul3, DCNL1/2, and DCNL3. (A) Human normal tissue blots (ProSci Incorporated) were analyzed for expression of DCNL3, DCNL1/2, and Cul3 by immunoblotting with specific antibodies. Equal loading was controlled by Ponceau 5 staining. Note that DCNL3 is highly expressed in some ectoderm-derived tissues (e.g., skin) compared with rather low expression in the mesoderm (e.g., spleen or heart), suggesting a developmental role of DCNL3. (B) Affinity-purified DCNL3 antibodies were probed on total HeLa extracts, and down-regulated for DCNL3 (lane 2) or scrambled siRNA oligo controls (lane 1). The band identified as DCNL3 (\*) migrates slightly faster compared with overexpressed DCNL3-HA (lane 3, filled arrowhead). Ten nanograms of recombinant MBP (lane 4) or MBP-DCNL3 (lane 5, open arrowhead), MBP-DCNL2 (lane 6), and MBP-DCNL1 (lane 7) was probed for recognition with DCNL3 antibodies. Input levels were controlled by immunoblotting with MBP antibodies. (C) Affinity-purified DCNL1/2 antibodies cross-react with the closely related DCNL1 and DCNL2. DCNL1/2 antibodies were probed on total HeLa extract, down-regulated for DCNL1 and DCNL2 (lane 2) or scrambled siRNA oligo controls (lane 1). The band down-regulated by RNAi (\*) migrates at the same size as DCNL2-HA (lane 3) and DCNL1-HA (lane 4), which were both recognized by the antibody (filled arrowhead). Ten nanograms of recombinant MBP (lane 5) or MBP-DCNL2 (lane 6), MBP-DCNL1 (lane 7), MBP-DCNL3 (lane 8) was probed for recognition with DCNL1/2 antibodies (open arrowhead). Input levels were controlled by immunoblotting with HA or MBP antibodies.







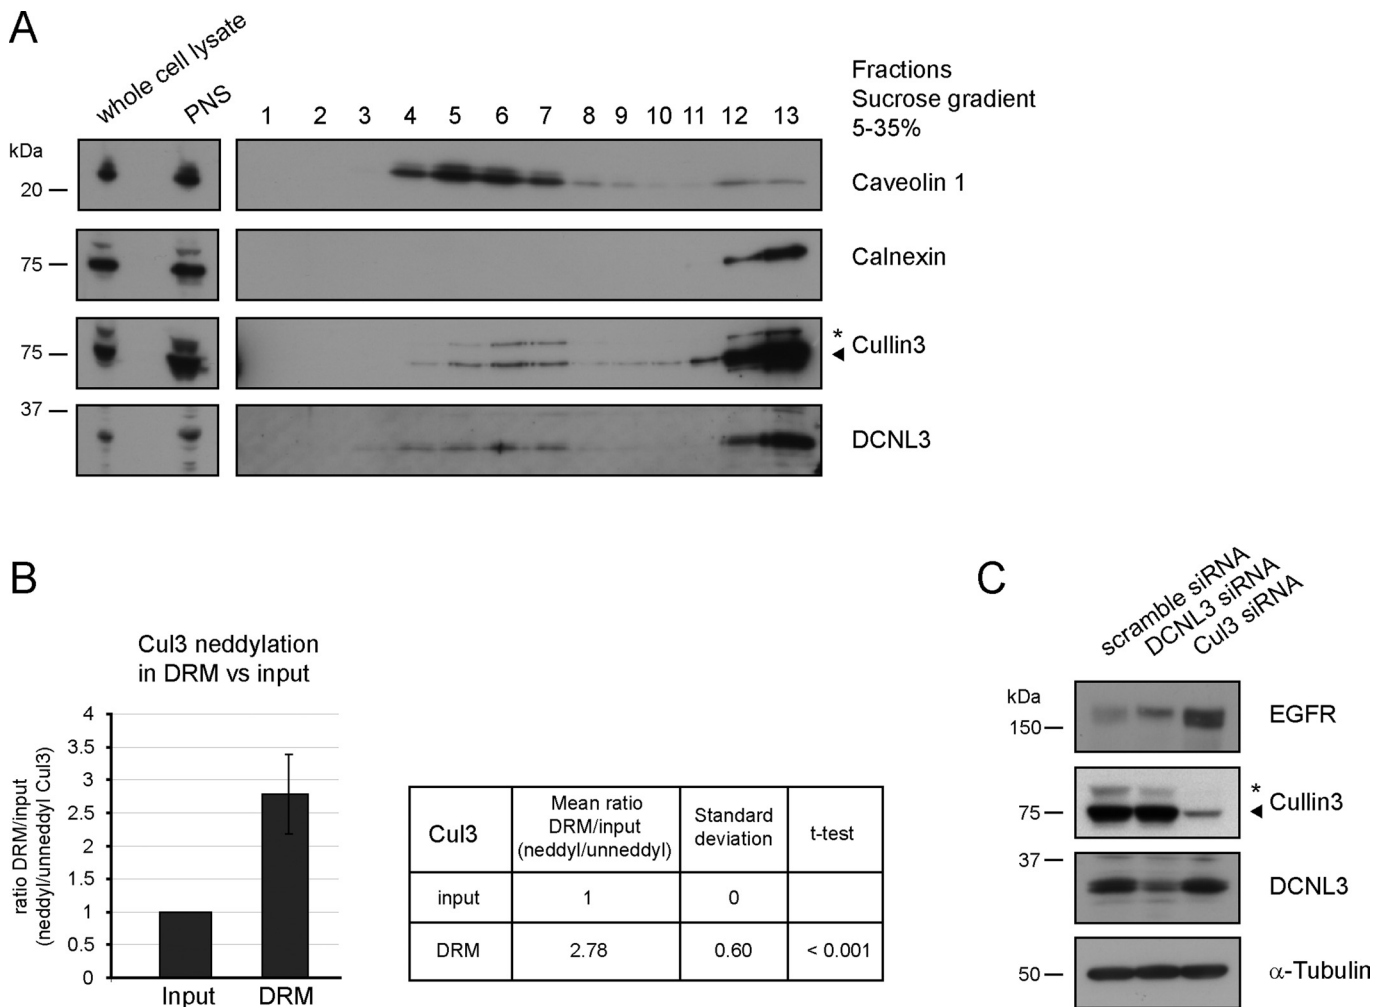

**Fig. 57.** Membrane-activated Cul3 may regulate intracellular trafficking pathways. (A) HeLa cells were lysed in 1% Triton X-100 (whole cell) and the postnuclear supernatant (PNS) was loaded under a 5–35% sucrose gradient. DRMs float in the gradient because of their lipid composition and cholesterol content whereas solubilized membranes are pelleted to the bottom. The gradient was harvested from the top (fraction 1: lightest fraction) and each fraction was tested for the presence of Cul3 and DCNL3 by using specific antibodies. Marker proteins for DRMs: Caveolin1; for soluble membranes: Calnexin. (B) The ratio of neddylation over unneddylated Cul3 was determined from 3 independent experiments comparing the Cul3 peak fraction in the DRMs to the Cul3 in the input fraction. Student's *t* test was performed to assess the significance of the difference between lysate input and DRM neddylation. Values <0.01 are judged as highly significant. (C) Whole-cell lysates of HeLa cells depleted of DCNL3, Cul3, or with a control scramble siRNA oligo were analyzed by immunoblotting with EGFR antibodies. Depletion efficiency was controlled with antibodies specific for DCNL3 or Cul3, while  $\alpha$ -tubulin was used to control for equal loading. Note that EGFR accumulates in cells depleted for Cul3 and to a lesser extent upon down-regulation of DCNL3. Arrowhead indicates unneddylated Cul3; asterisk indicates neddylated Cul3.
